# Supplementary material for: Enterovirus VP1 protein and HLA class I hyperexpression in pancreatic islet cells of organ donors with type 1 diabetes
Source: Springer Nature journal article supplement (doi:10.1007/s00125-025-06384-9), 2025-03-16
Supplement: MOESM2 [file 125_2025_6384_MOESM2_ESM.pdf › 125_2025_6384_MOESM2_ESM.pdf]

**ESM Table 2: Distribution of donors and assays performed**

|                               | Pancreas |             | Spleen  | Duodenum | PLN     |
|-------------------------------|----------|-------------|---------|----------|---------|
| Donor Group                   | VP1 IHC  | HLA Class I | VP1 IHC | VP1 IHC  | VP1 IHC |
| No Diabetes                   | 76       | 54          | 37      | 21       | 0       |
| Single AAb positive (AAb+)    | 19       | 20          | 9       | 9        | 0       |
| Dual Aab positive (AAb++)     | 9        | 9           | 4       | 4        | 1       |
| Type 1 diabetes Residual ICIs | 40       | 39          | 16      | 10       | 4       |
| Type 1 diabetes IDIs only     | 42       | 27          | 30      | 26       | 5       |
| TOTAL                         | 186      | 149         | 96      | 70       | 10      |

**ESM Table 3: Distribution of donors and assays performed**

| Donor Group                   | Spleen    |              | Duodenum  |              | PLN       |              |
|-------------------------------|-----------|--------------|-----------|--------------|-----------|--------------|
|                               | Total (n) | No. VP1+ (%) | Total (n) | No. VP1+ (%) | Total (n) | No. VP1+ (%) |
| No Diabetes                   | 37        | 9 (24.3%)    | 21        | 3 (14.3%)    | 0         | -            |
| Single AAb positive (AAb+)    | 9         | 3 (33.3%)    | 9         | 4 (44.4%)    | 0         | -            |
| Dual Aab positive (AAb++)     | 4         | 1 (25%)      | 4         | 1 (25%)      | 1         | 1 (100%)     |
| Type 1 diabetes Residual ICIs | 16        | 8 (50.0%)    | 10        | 3 (30%)      | 4         | 2 (50%)      |
| Type 1 diabetes IDIs only     | 30        | 13 (43.3%)   | 26        | 12 (46.2%)   | 5         | 3 (60.0%)    |
| <b>All T1D</b>                | 46        | 21 (45.7%)   | 36        | 15 (41.7%)   | 9         | 5 (55.5%)    |
| <b>AAb+, AAb++ and T1D</b>    | 59        | 25 (42.4%)   | 49        | 20 (40.8%)   | 1         | 1 (100%)     |
| <b>TOTAL</b>                  | 96        | 34 (35.4%)   | 71        | 23 (32.4%)   | 10        | 6 (60%)      |

N/S by Fishers Exact Test

ESM Figure 1

a.

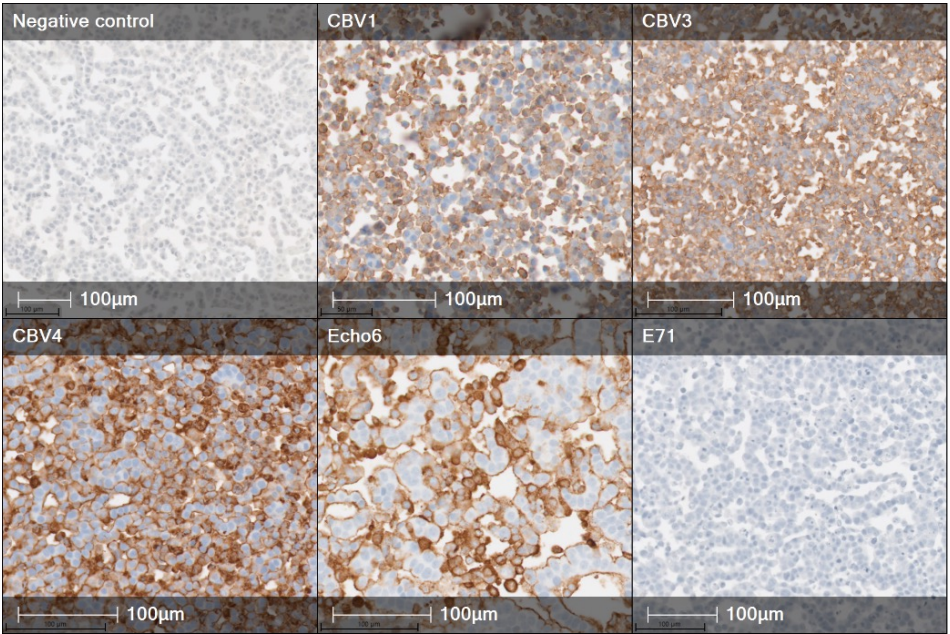

b.

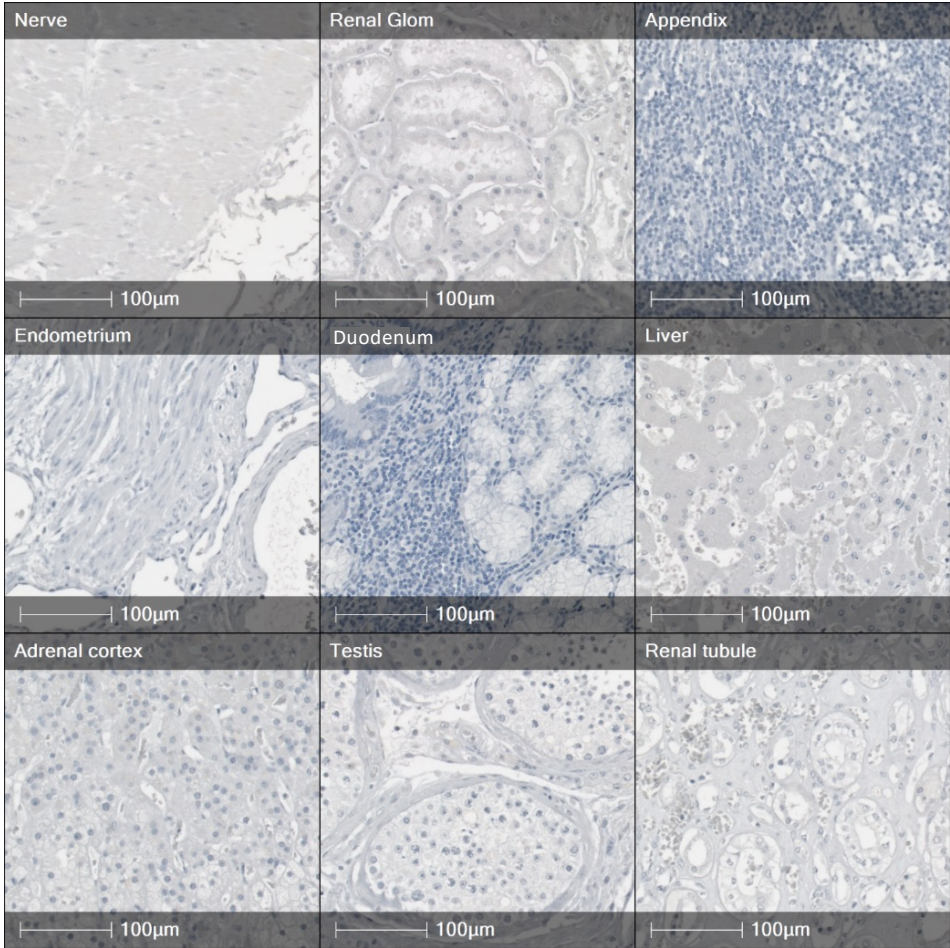

**ESM Figure 1a: Enteroviral VP1 immunostaining in a virally-infected cell microarray.** Representative immunostaining of VP1 in uninfected control cells (negative control), and cells infected with CVB1, CVB3, CVB4, echovirus 6 (Echo6) and enterovirus 71 (E71). Positive staining was observed in CVB1, 3, 4 and echo6, while no staining was seen in uninfected control cells or E71.

**ESM Figure 1b: Enteroviral VP1 immunostaining in normal tissue microarray.** Nerve, renal glomeruli, appendix, endometrium, duodenum, liver, adrenal cortex, testis and renal tubules were all negative for VP1. Scale bars - 100µm.



ESM Figure 2

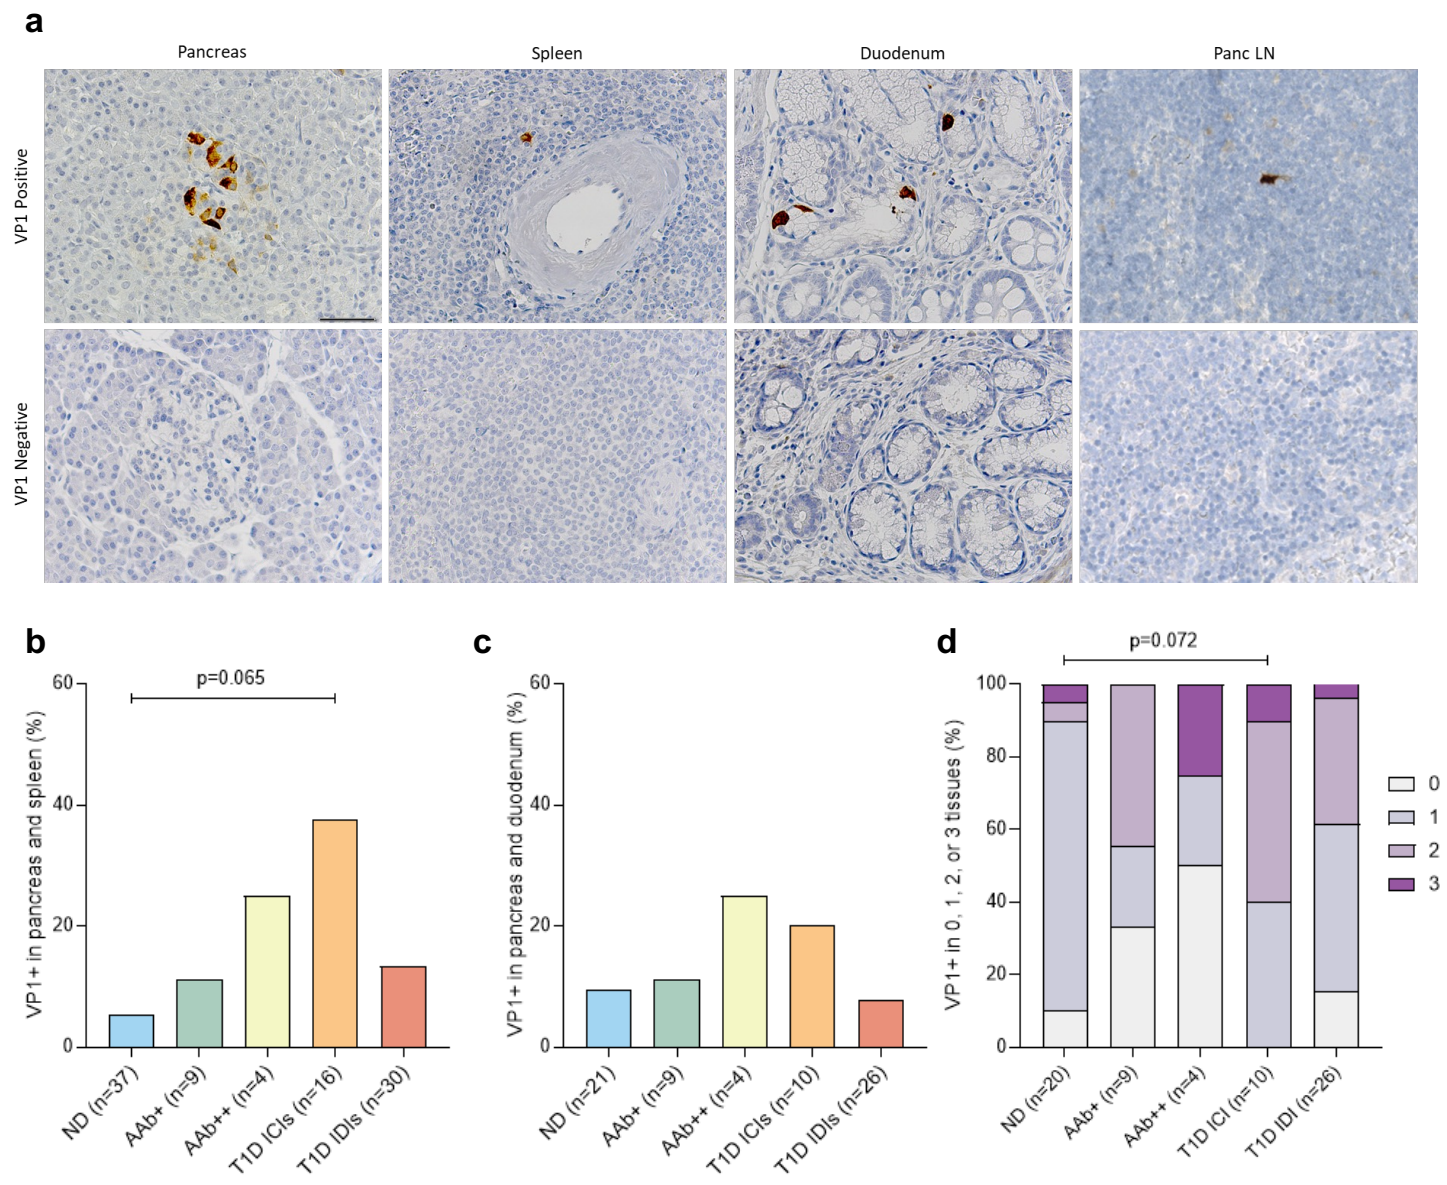

**ESM Figure 2a.** Representative images of VP1+ cells in nPOD donor pancreas, spleen, duodenum and PLN, compared with VP1- donors.

**ESM Figure 2b.** The proportion of donors in each donor group that have VP1 immunopositivity in both the spleen and pancreas.

**ESM Figure 2c.** The proportion of donors in each donor group that have VP1 immunopositivity in both the duodenum and pancreas.

**ESM Figure 2d.** The proportion of donors in each donor group that have VP1 immunopositivity in 0, 1, 2, or 3 different organs (pancreas, spleen and duodenum).

Two sided Fishers Exact Test with significance shown after FDR corrections for multiple comparisons.



## ESM Figure 3

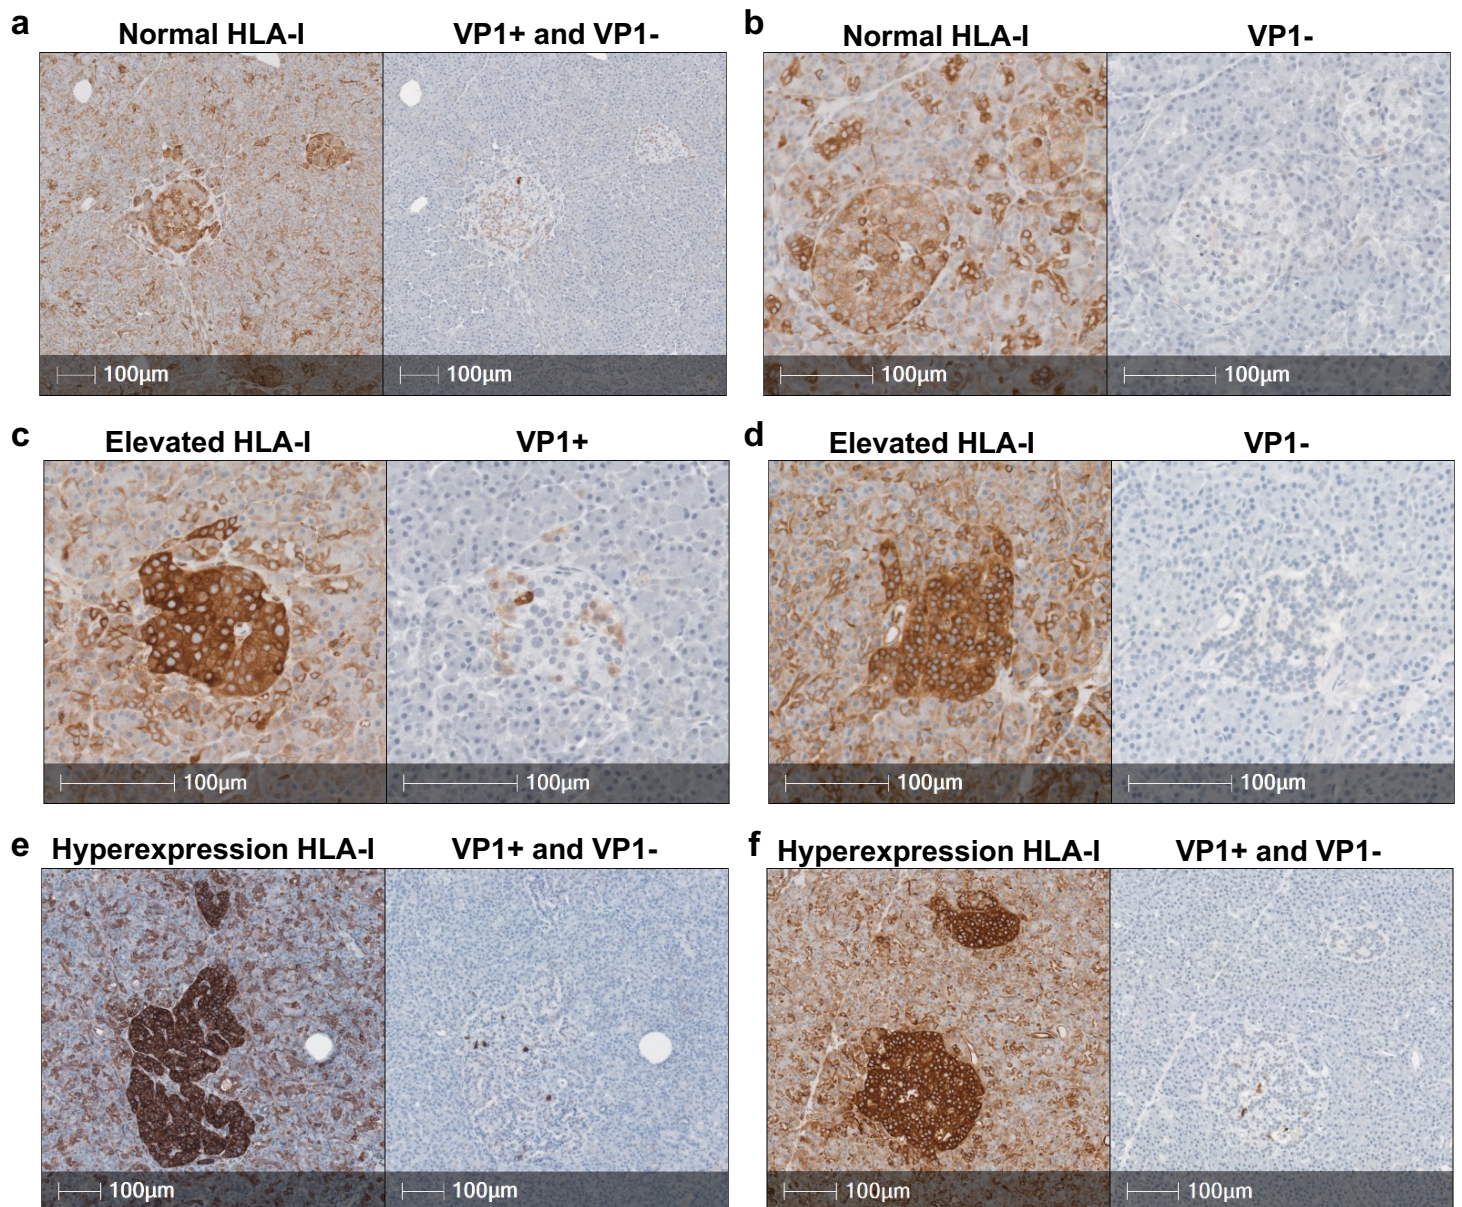

**ESM Figure 3a.** Representative images of two islets with normal HLA-I expression, one containing a VP1+ cell and one VP1-.

**ESM Figure 3b.** Representative images of two islets with normal HLA-I expression, both VP1-.

**ESM Figure 3c.** Representative images of one islet with elevated HLA-I expression containing a VP1+ cell.

**ESM Figure 3d.** Representative images of one islet with elevated HLA-I expression and VP1-.

**ESM Figure 3e.** Representative images of two islets with HLA-I hyperexpression, one containing several VP1+ cells and one VP1-.

**ESM Figure 3f.** Representative images of two islets with HLA-I hyperexpression, one containing several VP1+ cells and one VP1-.

## **nPOD-Virus group members:**

### **nPOD-V Funding 2012: Funding Reference Breakthrough T1D (former JDRF) JDRF-25-2012-516**

#### **Participants:**

- Pugliese, Alberto, M.D. Arthur Riggs Diabetes & Metabolism Research Institute, City of Hope, Duarte, CA, USA.
- Atkinson, Mark, Ph.D. University of Florida, USA.
- Campbell-Thompson, Martha University of Florida, USA.
- Chapman, Nora, Ph.D. University of Nebraska, USA.
- Coppieters, Ken University of Ghent, Belgium.
- Dotta, Francesco, M.D. University of Siena, Italy.
- Eisenbarth, George, M.D., Ph.D. Barbara Davis Center for Childhood Diabetes, USA.
- Ferreira, Ricardo, Ph.D JDRF/WT Diabetes & Inflammation Laboratory, USA.
- Frisk, Gun, Ph.D. University of Uppsala, Sweden.
- Gianani, Roberto, M.D. Barbara Davis Center for Childhood Diabetes, USA.
- Gerling, Ivan, Ph.D University of Tennessee, USA.
- Homann, Dirk, M.D. University of Colorado at Denver, USA.
- Hyöty, Heikki, Ph.D. Tampere University, Finland.
- Lloyd, Richard, Ph.D. Baylor College of Medicine, USA.
- Kaddis, John, Ph.D. City of Hope National Medical Center, USA.
- Kent, Sally, Ph.D. University of Massachusetts, USA.
- Morgan, Noel, Ph.D. University of Exeter, UK.
- Nadler, Jerry, M.D., Ph.D. East Virginia Medical School, USA.
- Morris Fear, Margareta, Ph.D. East Virginia Medical School, USA.
- Nyalwilde, Julius, Ph.D. East Virginia Medical School, USA.
- Oikarinen, Maarit Tampere University, Finland.
- Plagnol, Vincent, Ph.D. University College of London, UK.
- Petrosino, Joseph, Ph.D. Baylor College of Medicine, USA.
- Richardson, Sarah, Ph.D. University of Exeter, UK.
- Sarkar, Suparna Barbara Davis Center for Childhood Diabetes, USA.
- Schneider, Darius La Jolla Institute for Allergy & Immunology, USA.
- Thackray, Larissa, Ph.D. Washington University, USA.
- Toniolo, Antonio. M.D. University of Insubria, Italy.
- Virgin, Herbert Washington University, USA.
- Von Herrath, Matthias La Jolla Institute for Allergy & Immunology, USA.

### **nPOD-V Grant 2017: Funding Reference Breakthrough T1D (former JDRF) JDRF-3-SRA-2017-492-A-N**

#### **Participants:**

- Alberto Pugliese, Arthur Riggs Diabetes & Metabolism Research Institute, City of Hope, Duarte, CA, USA.

- Richard Lloyd, Baylor College of Medicine, USA.
- Margaret Morris, Eastern Virginia Medical School, USA.
- Roberto Mallone, INSERM, Paris, France.
- Malin Flodström Tullberg, Karolinska Institutet, Sweden.
- Matthias von Herrath, La Jolla Institute for Allergy and Immunology, USA.
- Jerry Nadler, Eastern Virginia Medical School, USA.
- Julius Nyalwidhe, Eastern Virginia Medical School, USA.
- Teresa Rodriguez-Calvo, La Jolla Institute for Allergy & Immunology, USA and Helmholtz Munich, Germany.
- Sally Kent, University of Massachusetts Medical School, USA.
- Antonio Toniolo, University of Insubria, Italy.
- Kathrin Maedler, University of Bremen, Germany.
- Marc Horwitz, University of British Columbia, Canada.
- Noel Morgan, University of Exeter Medical School, UK.
- Sarah Richardson, University of Exeter Medical School, UK.
- Mark Atkinson, University of Florida, USA.
- Ivan Gerling, The University of Tennessee Health Science Center, USA.
- Heikki Hyöty, Tampere University, Finland.
- Isaac Snowwhite, University of Miami School of Medicine, USA.
- Filippo Canducci, University of Insubria, Italy.
- Alessandro Salvatoni, University of Insubria, Italy.

**Additional members (some participated in discussions, but their participation in the group was more informal).**

- Soile Tuomela PhD (Karolinska Institutet, Sweden)
- Ben Giepmans PhD (University of Groningen, Netherlands)
- Varpu Marjomaki PhD (University of Jyväskylä, Finland)
